# Supplementary material for: Synthesis, structure, and magnetic properties of diamagnetic Co(iii) ion-based heterometallic CoIII–LnIII (Ln = Dy, Tb, Ho, Er) complexes
Source: Royal Society of Chemistry journal article supplement (doi:10.1039/d4nj02058h), 2024-01-01
Supplement: d4nj02058h1.pdf [file d4nj02058h1.pdf]

# Synthesis, Structure, and Magnetic Properties of Diamagnetic Co(III) ion-based Heterometallic Co<sup>III</sup>-Ln<sup>III</sup> (Ln = Dy, Tb, Ho, Er) Complexes

*Nandini Barman<sup>a</sup>, Purbashree Halder<sup>a</sup>, Subrata Mukhopadhyay<sup>a</sup>, Björn Schwarz<sup>\*b</sup>, Enrique Colacio,<sup>\*c</sup> Rajanikanta Rana<sup>d</sup>, Gopalan Rajaraman<sup>\*d</sup>, and Joydeb Goura<sup>\*a,e,f</sup>*

<sup>a</sup>Department of Chemistry, Jadavpur University, Kolkata-700032, India

<sup>b</sup>Karlsruhe Institute of Technology (KIT) – Institute for Applied Materials (IAM), Hermann-von-Helmholtz-Platz 1, 76344 Eggenstein-Leopoldshafen, Germany

<sup>c</sup>Departamento de Química Inorgánica, Facultad de Ciencias, Universidad de Granada, Av. Fuentenueva S/N, 18071 Granada, Spain

<sup>d</sup>Department of Chemistry, Indian Institute of Technology, Bombay, Powai, Mumbai, Maharashtra 400076, India

<sup>e</sup>Department of Chemistry, University of Delhi, Delhi-110007, India

<sup>f</sup>Department of Chemistry, Bangabasi College, Kolkata-700009

Joydeb Goura: [jgoura@chemistry.du.ac.in](mailto:jgoura@chemistry.du.ac.in)

[joydebgoura@gmail.com](mailto:joydebgoura@gmail.com)

[bjoern.schwarz@kit.edu](mailto:bjoern.schwarz@kit.edu)

[ecolacio@ugr.es](mailto:ecolacio@ugr.es)

[rajaraman@chem.iitb.ac.in](mailto:rajaraman@chem.iitb.ac.in)

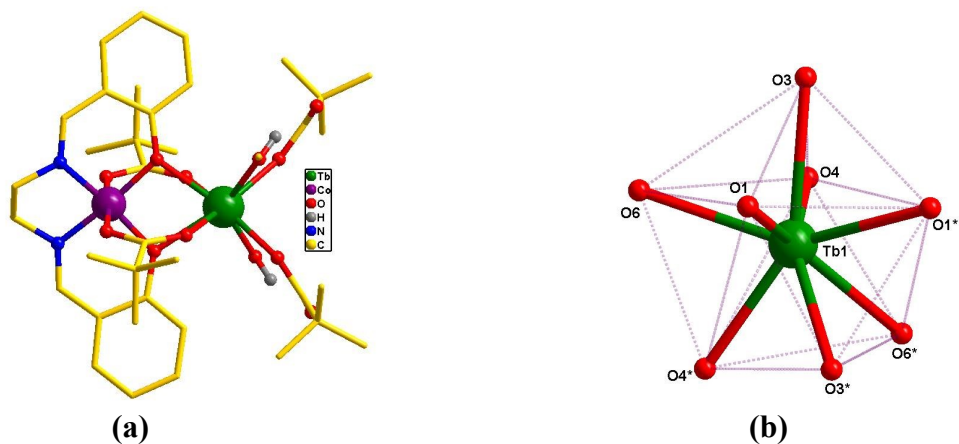

**Figure S1.** (a) Molecular structure of **2**. All hydrogen atoms have been omitted for clarity. (b) distorted triangular dodecahedron geometry of the terbium center in **2**.

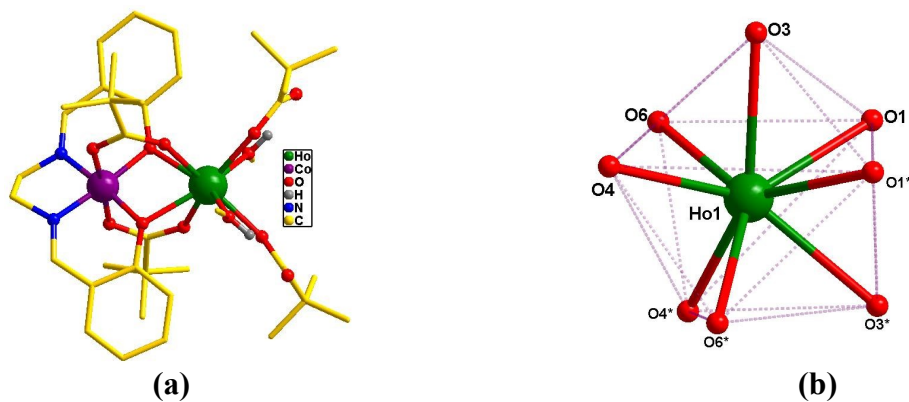

**Figure S2.** (a) Molecular structure of **3**. All hydrogen atoms have been omitted for clarity. (b) distorted triangular dodecahedron geometry of the terbium center in **3**.

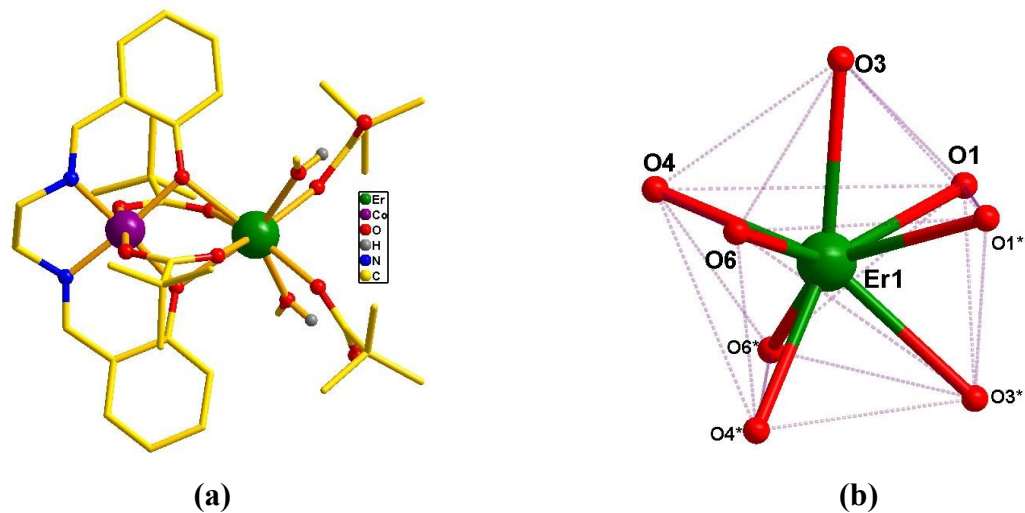

**Figure S3.** (a) Molecular structure of **4**. All hydrogen atoms have been omitted for clarity. (b) distorted triangular dodecahedron geometry of the terbium center in **4**.

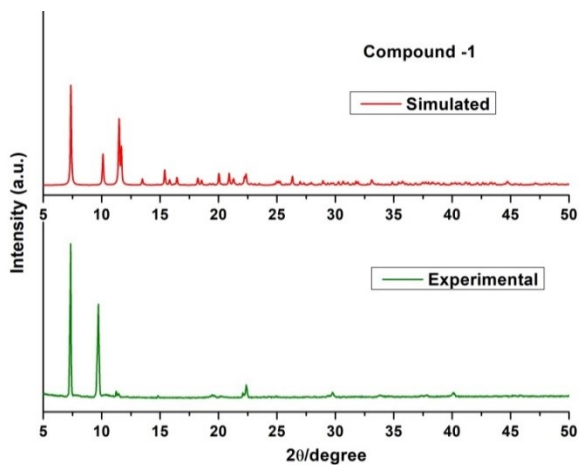

Figure S4. Room temperature PXRD of complex 1

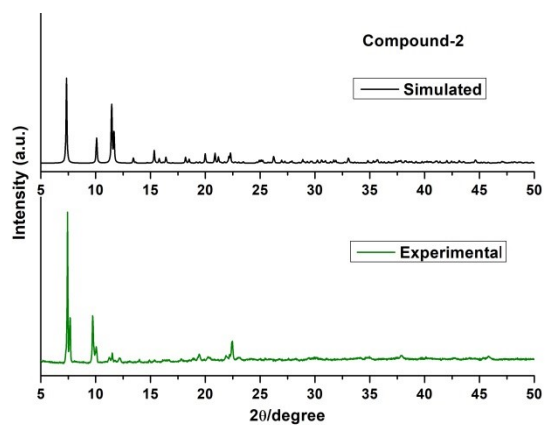

Figure S5. Room temperature PXRD of complex 2

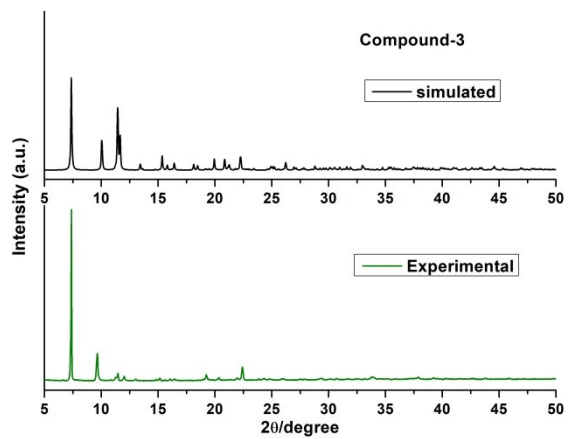

Figure S6. Room temperature PXRD of complex 3

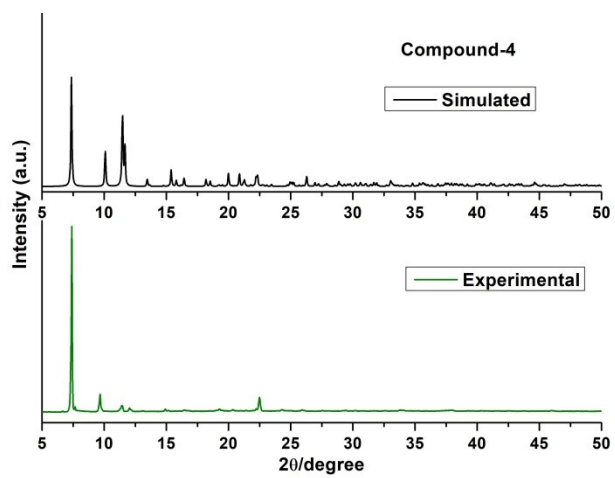

**Figure S7.** Room temperature PXRD of complex 4

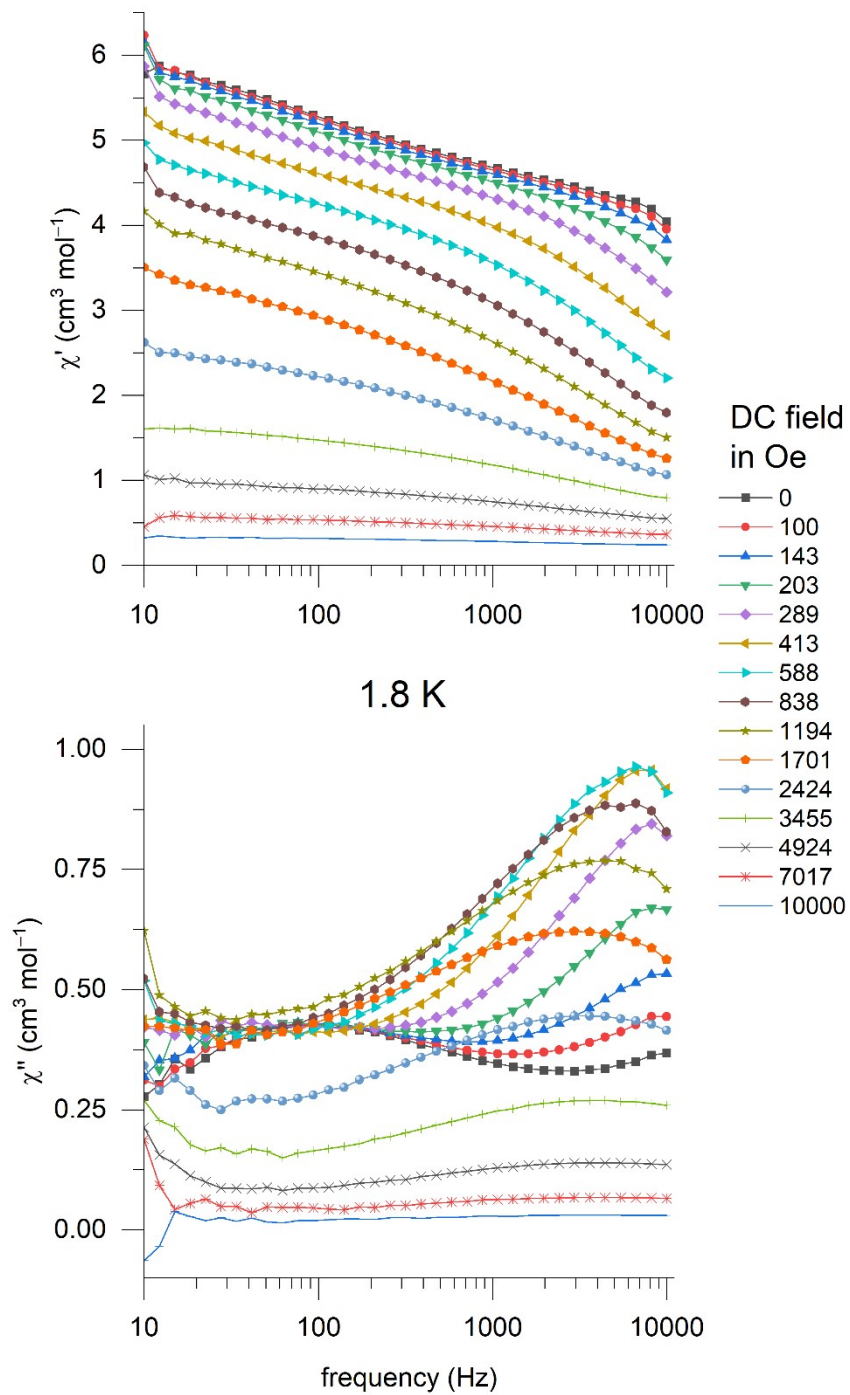

**Figure S8.** Real part  $\chi'$  and imaginary part  $\chi''$  of AC susceptibility measured for **1** at various magnetic DC fields at 1.8 K. Errors bars have been omitted for clarity but are smaller than symbols except for the very low frequencies.

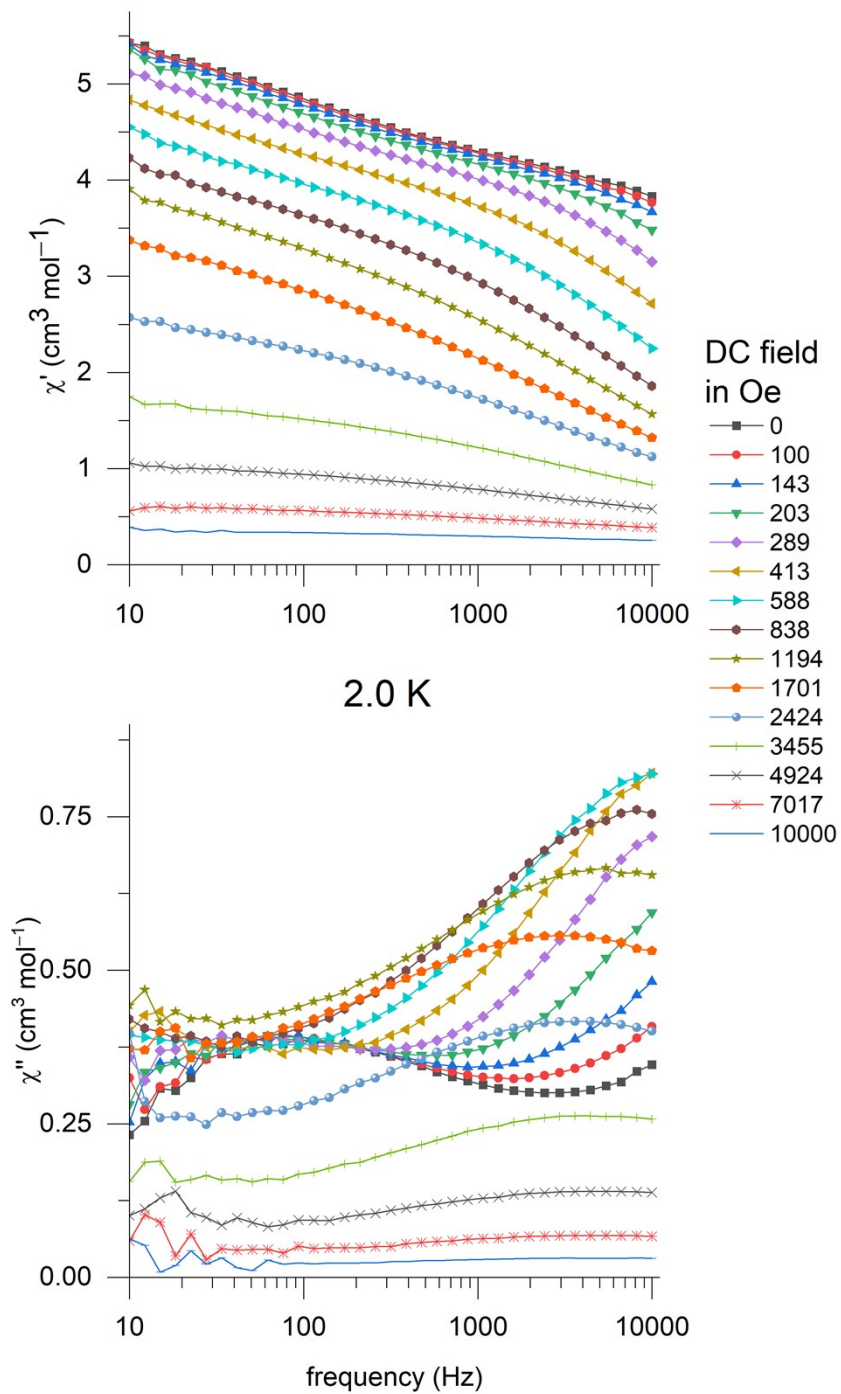

**Figure S9.** Real part  $\chi'$  and imaginary part  $\chi''$  of AC susceptibility measured for **1** at various magnetic DC fields at 2.0 K. Errors bars have been omitted for clarity but are smaller than symbols except for the very low frequencies.

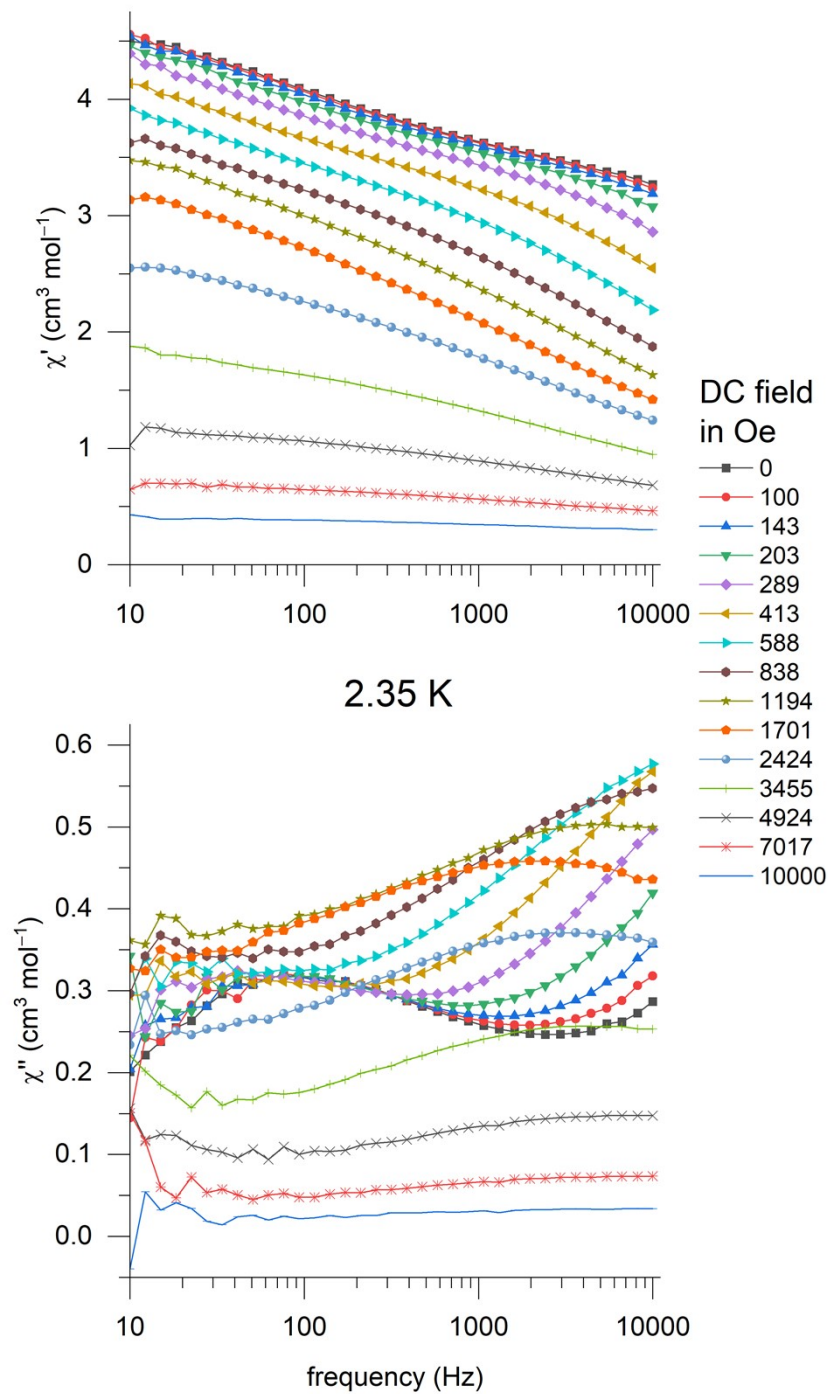

**Figure S10.** Real part  $\chi'$  and imaginary part  $\chi''$  of AC susceptibility measured for **1** at various magnetic DC fields at 2.35 K. Errors bars have been omitted for clarity but are smaller than symbols except for the very low frequencies.

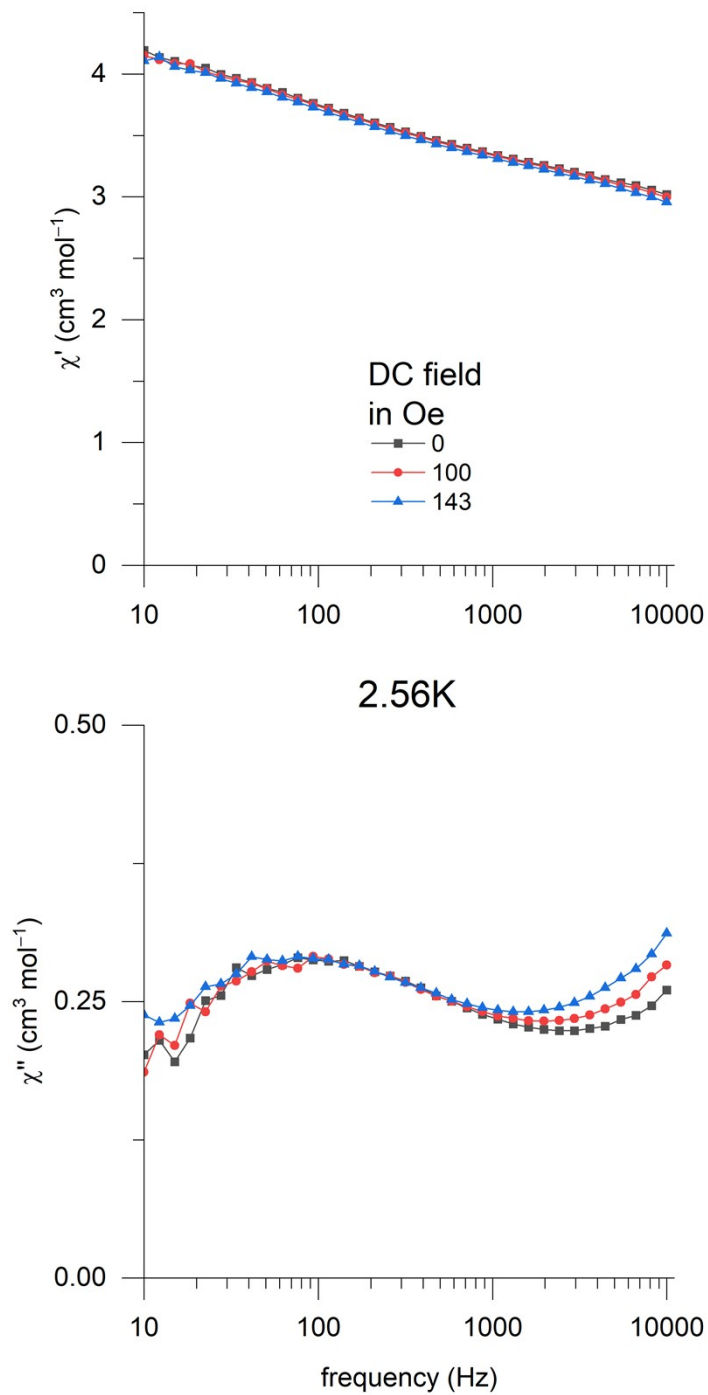

**Figure S11.** Real part  $\chi'$  and imaginary part  $\chi''$  of AC susceptibility measured for **1** at various magnetic DC fields at 2.56 K. Errors bars have been omitted for clarity but are smaller than symbols except for the very low frequencies.



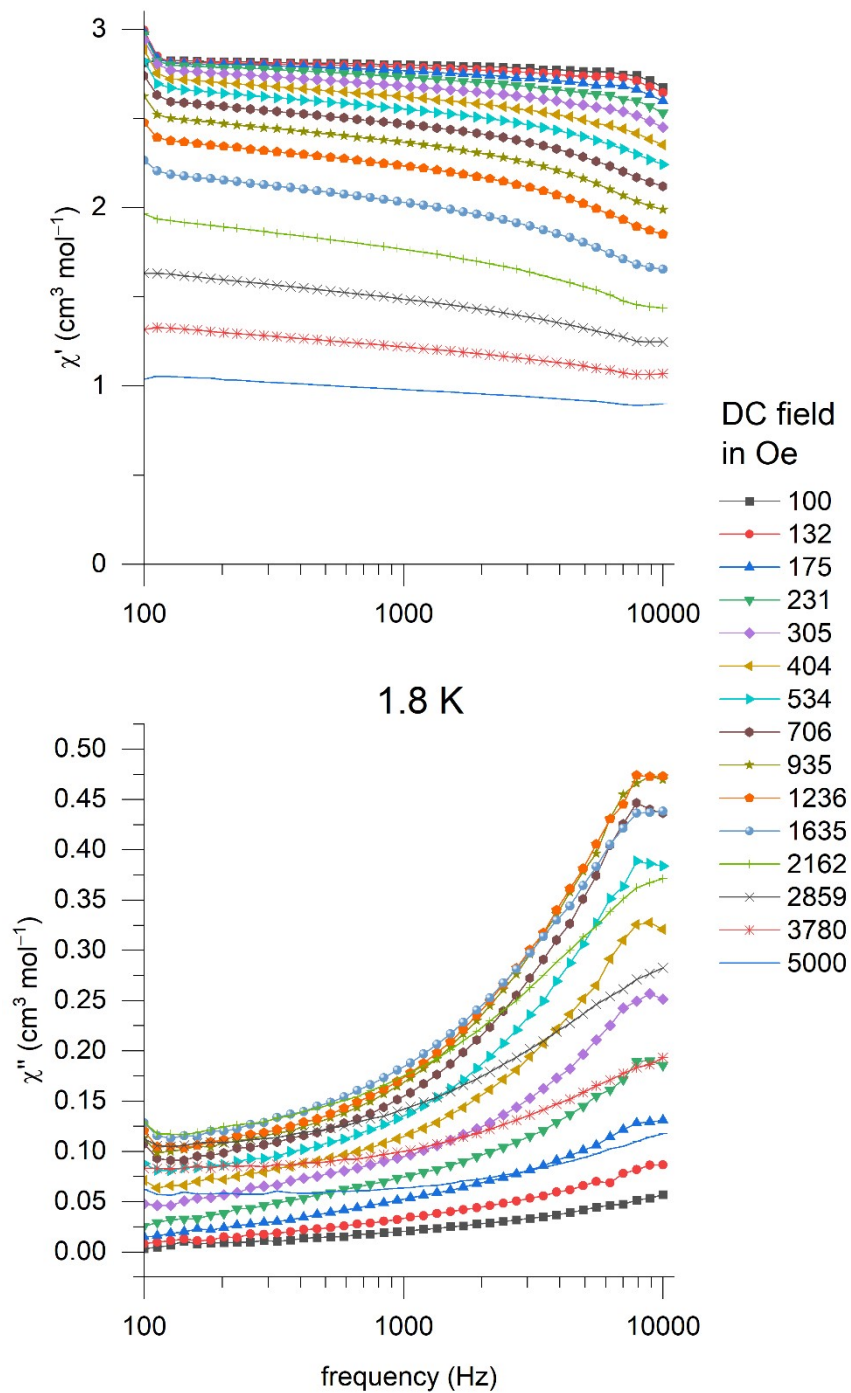

**Figure S12.** Real part  $\chi'$  and imaginary part  $\chi''$  of AC susceptibility measured for **4** at various magnetic DC fields (numbers in legend give field in Oe) at 1.8 K. Errors bars have been omitted for clarity but are smaller than symbols except for the very low frequencies.

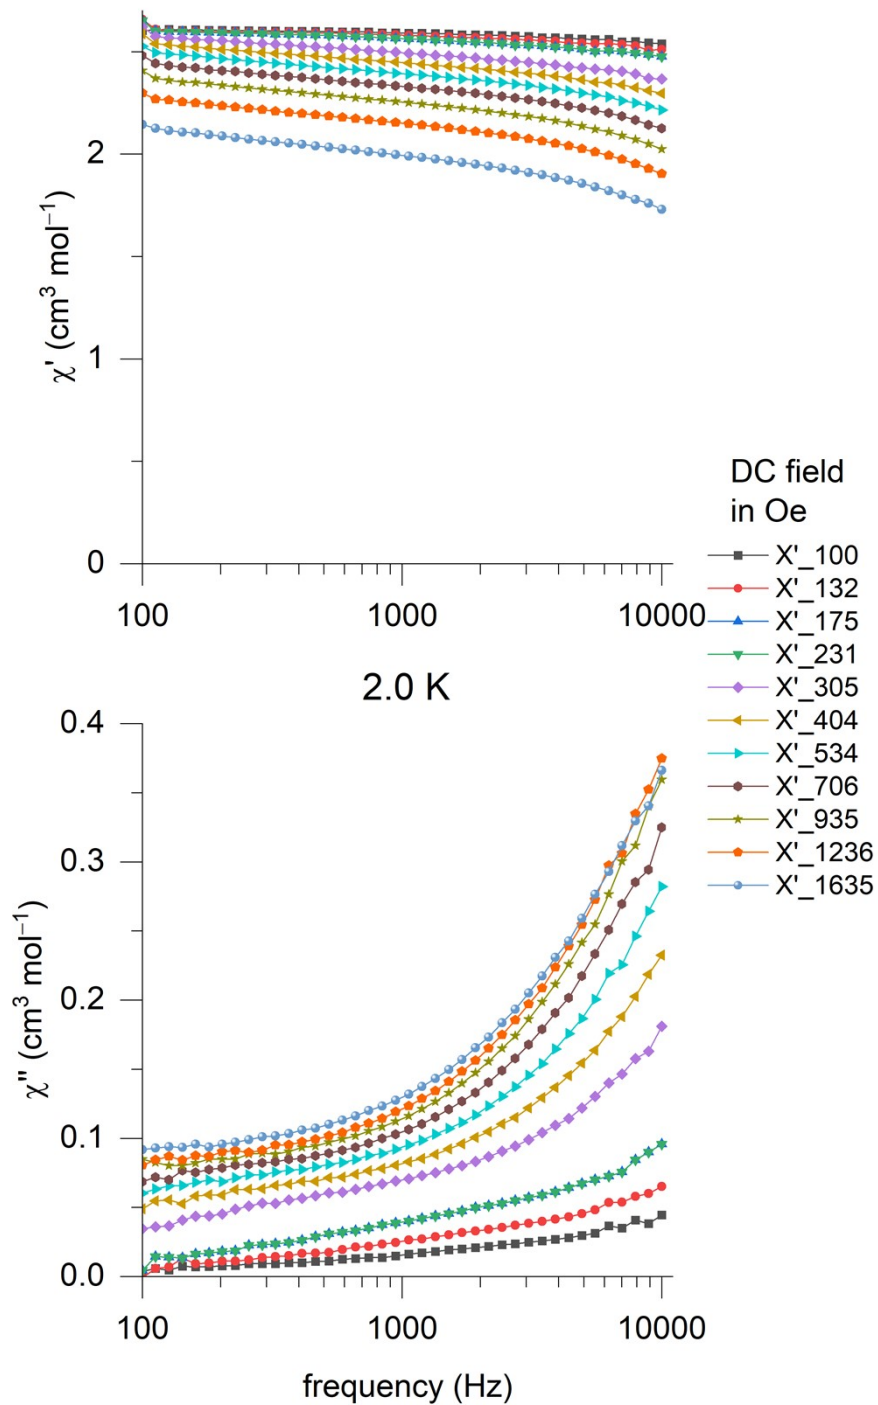

**Figure S13.** Real part  $\chi'$  and imaginary part  $\chi''$  of AC susceptibility measured for **4** at various magnetic DC fields up to 1635 Oe at 2.0 K (for legend see measurement at 1.8 K). Errors bars have been omitted for clarity but are smaller than symbols except for the very low frequencies.

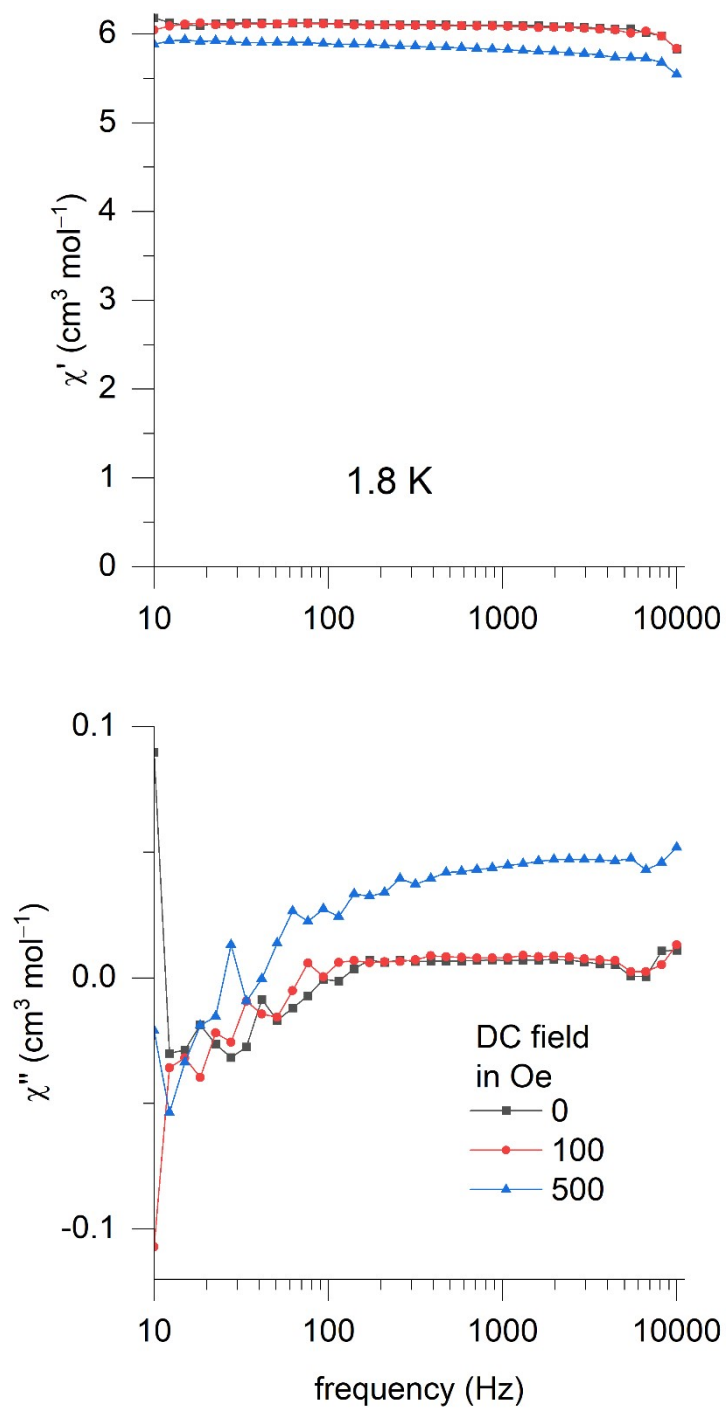

**Figure S14.** Real part  $\chi'$  and imaginary part  $\chi''$  of AC susceptibility measured for **2** at various magnetic DC fields at 1.8 K. Errors bars have been omitted for clarity but are smaller than symbols except for the very low frequencies.

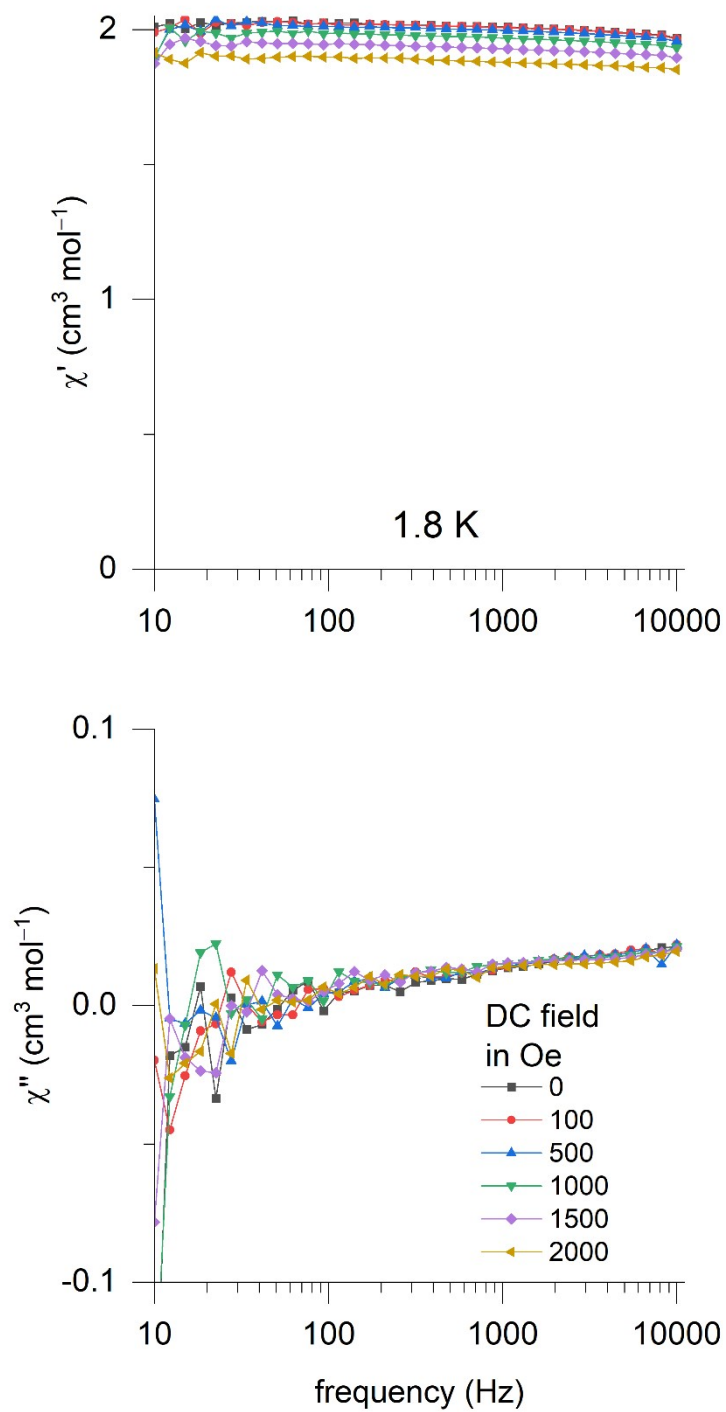

**Figure S15.** Real part  $\chi'$  and imaginary part  $\chi''$  of *AC* susceptibility measured for **3** at various magnetic *DC* fields at 1.8 K. Errors bars have been omitted for clarity but are smaller than symbols except for the very low frequencies.

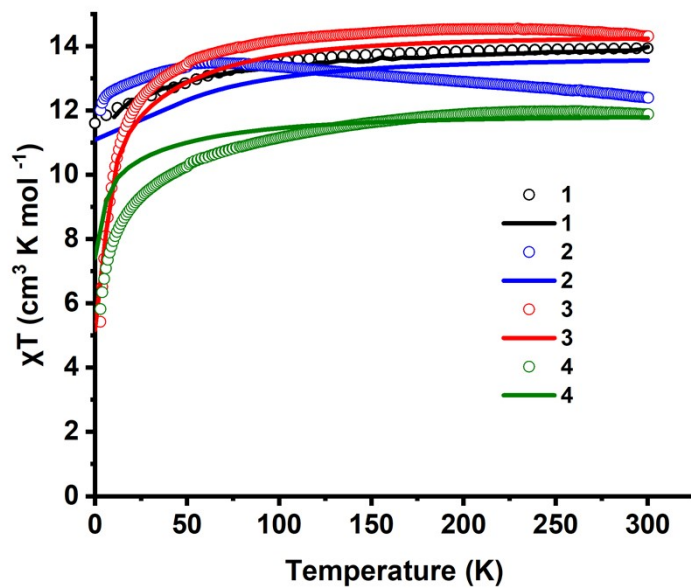

**Figure S16.** DC magnetometry measurements (circles) and CASSCF calculated (lines) obtained for **1-4**: a)  $\chi T$  vs. temperature

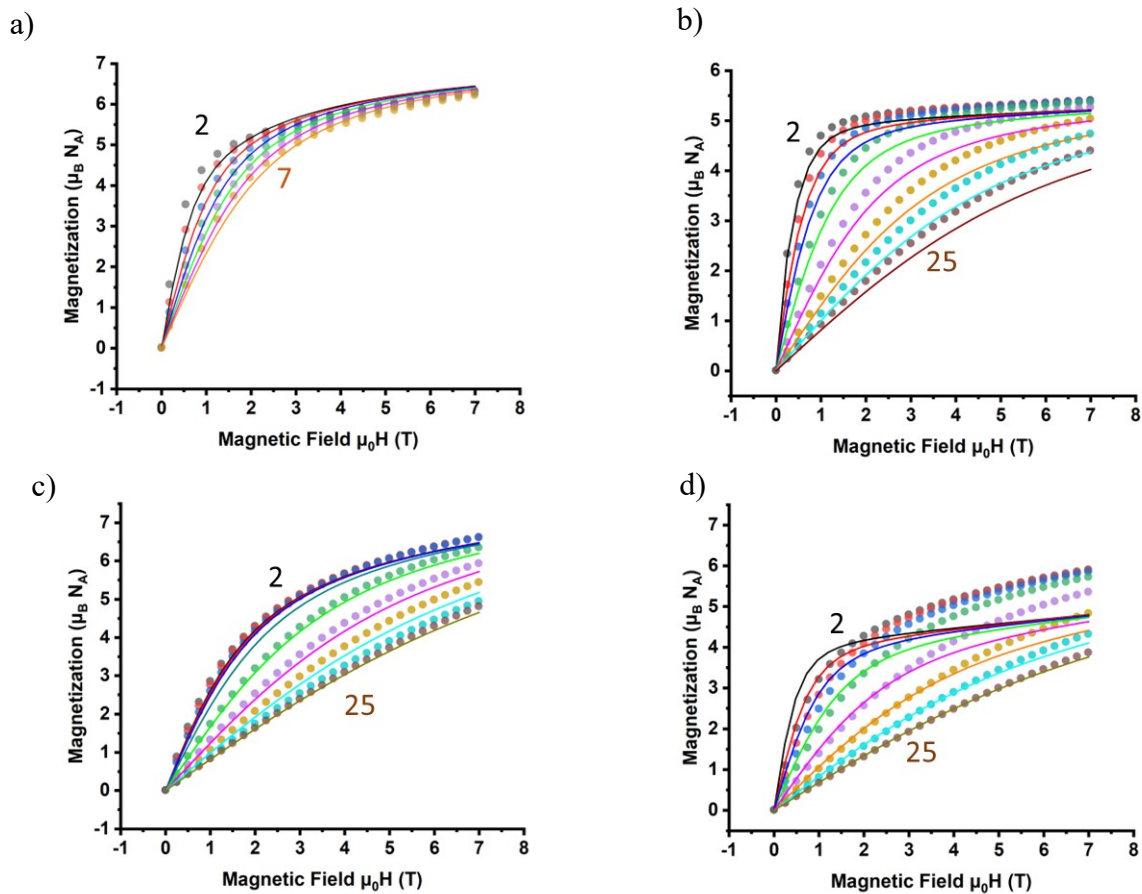

**Figure S17.** DC magnetometry measurements (circles) and CASSCF calculated (lines) obtained for 1-4: (a-d) magnetization vs. field. The numbers give the lowest and highest

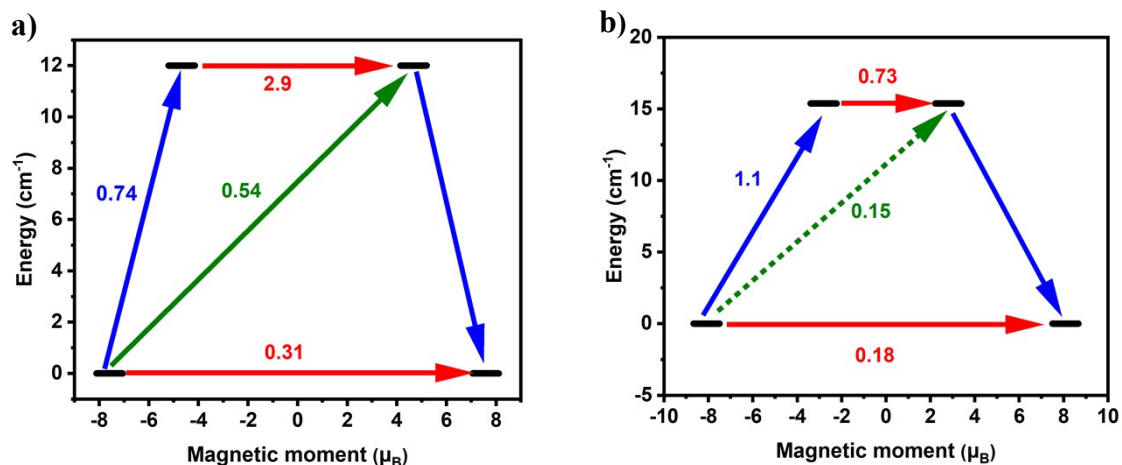

Figure S18. Magnetic relaxation in **1** (a) and **4** (b) involves multiple pathways: Kramer's doublet (KD), QTM/TA-QTM via ground/excited states (red arrow), potential Orbach pathway (green arrow), and the most probable relaxation pathway (blue arrow). Associated numbers indicate mean absolute values of corresponding magnetic transition moment matrix elements.

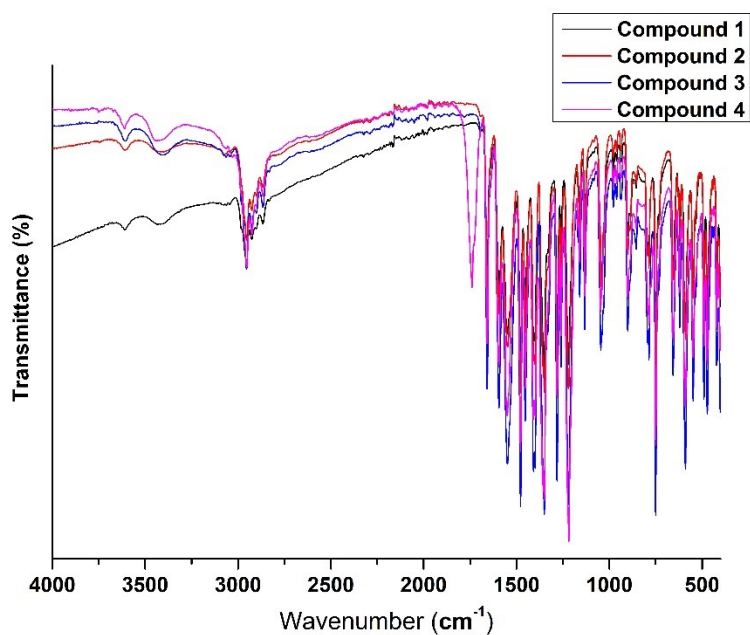

Figure S19. IR spectrum of complexes **1-4**.

## Equations

Hamiltonian used for the magnetic models to simulate DC magnetic data:

$$\hat{H} = \hat{H}_{CF} + \hat{H}_{ZEE} \quad (\text{eqS1})$$

$\hat{H}_{ZEE}$ : Zeeman effect

$\hat{H}_{CF}$ : crystal field interaction

$$\hat{H}_{ZEE} = \mu_B \sum_{i=1}^N (\sigma_i \vec{\tilde{L}}_i \cdot \vec{\bar{I}} + \vec{\tilde{S}}_i \cdot \vec{\bar{g}}_i) \cdot \vec{B}$$

$\sigma_i$ : orbital reduction parameters

$\vec{\tilde{L}}_i$ : Vector operator total orbital momentum

$\vec{\tilde{S}}_i$ : Vector operator total spin orbital momentum

$\mu_B$ : Bohr magneton

$\vec{\bar{I}}$ : identity matrix

$\vec{\bar{g}}_i$ : g-tensor

$\vec{B}$ : magnetic induction

$$\hat{H}_{CF} = \sum_{i=1}^N \sum_{k=2,4,6q} \sum_{=-k}^k \sigma_i^k B_{ki}^q \theta_k \partial_{ki}^q$$

$B_{ki}^q$ : Crystal field parameters ( $A_{ki}^q \langle r^k \rangle_i$  in Steven's notation)

$\theta_k$ : operator equivalent factors

$\partial_{ki}^q$ : operator equivalents



**Table S1.** Sample masses and diamagnetic correction parameters used for DC and AC magnetometry measurements for compounds **1-4**

| Compounds                                                              | <b>1</b>                | <b>2</b>                | <b>3</b>                | <b>4</b>                |
|------------------------------------------------------------------------|-------------------------|-------------------------|-------------------------|-------------------------|
| Lanthanoide                                                            | Dysprosium(Dy)          | Terbium (Tb)            | Holmium (Ho)            | Erbium (Er)             |
| Sample mass (mg)                                                       | 12.4(1)                 | 13.7                    | 13.7(1)                 | 17.1(1)                 |
| Molar mass (g mol <sup>-1</sup> )                                      | 956                     | 952                     | 958                     | 961                     |
| Sample amount (mol)                                                    | $1.29707 \cdot 10^{-5}$ | $1.43908 \cdot 10^{-5}$ | $1.43006 \cdot 10^{-5}$ | $1.7794 \cdot 10^{-5}$  |
| Diam. Contrib. pp capsule (emu Oe <sup>-1</sup> )                      | $-7.71 \cdot 10^{-9}$   | $-7.71 \cdot 10^{-9}$   | $-7.71 \cdot 10^{-9}$   | $-7.71 \cdot 10^{-9}$   |
| Diam. Contrib. closed shells (emu mol <sup>-1</sup> Oe <sup>-1</sup> ) | $-8.3731 \cdot 10^{-5}$ | $-8.3731 \cdot 10^{-5}$ | $-8.3731 \cdot 10^{-5}$ | $-8.4527 \cdot 10^{-5}$ |

**Table S2.** BVS calculation for complexes 1-4.

| Compounds | Bond distances $r_1$ |          | $r_0$ for $\text{Co}^{2+}$ | B    |                | $r_0$ for $\text{Co}^{3+}$ | B          |                | Assigned               |
|-----------|----------------------|----------|----------------------------|------|----------------|----------------------------|------------|----------------|------------------------|
| <b>1</b>  | Co1 - O1*            | 1.925(4) | 1.692                      | 0.37 | 0.53274        | 1.680                      | 0.37       | 0.51574        |                        |
|           | Co1 - O1             | 1.925(4) | 1.692                      | 0.37 | 0.53274        | 1.680                      | 0.37       | 0.51574        |                        |
|           | Co1 - O3*            | 1.899(3) | 1.692                      | 0.37 | 0.57152        | 1.680                      | 0.37       | 0.55328        |                        |
|           | Co1 - O3             | 1.899(3) | 1.692                      | 0.37 | 0.57152        | 1.680                      | 0.37       | 0.55328        |                        |
|           | Co1 - N1             | 1.892(5) | 1.692                      | 0.37 | 0.58243        | 1.680                      | 0.37       | 0.56385        |                        |
|           | Co1 - N1*            | 1.892(5) | 1.692                      | 0.37 | 0.58243        | 1.680                      | 0.37       | 0.56385        |                        |
|           |                      |          | <b>Sum</b>                 |      | <b>3.37337</b> |                            | <b>Sum</b> | <b>3.26572</b> | <b>Co<sup>3+</sup></b> |
| <b>2</b>  | Co1 - O1*            | 1.935(5) | 1.692                      | 0.37 | 0.51853        | 1.680                      | 0.37       | 0.50198        |                        |
|           | Co1 - O1             | 1.935(5) | 1.692                      | 0.37 | 0.51853        | 1.680                      | 0.37       | 0.50198        |                        |
|           | Co1 - O2             | 1.906(5) | 1.692                      | 0.37 | 0.56080        | 1.680                      | 0.37       | 0.54291        |                        |
|           | Co1 -O2*             | 1.906(5) | 1.692                      | 0.37 | 0.56080        | 1.680                      | 0.37       | 0.54291        |                        |
|           | Co1 - N1*            | 1.902(6) | 1.692                      | 0.37 | 0.56690        | 1.680                      | 0.37       | 0.54881        |                        |
|           | Co1 - N1             | 1.902(6) | 1.692                      | 0.37 | 0.56690        | 1.680                      | 0.37       | 0.54881        |                        |
|           |                      |          | <b>Sum</b>                 |      | <b>3.29248</b> |                            | <b>Sum</b> | <b>3.18741</b> | <b>Co<sup>3+</sup></b> |
| <b>3</b>  | Co1 - O1*            | 1.932(2) | 1.692                      | 0.37 | 0.52275        | 1.680                      | 0.37       | 0.50607        |                        |
|           | Co1 - O1             | 1.932(2) | 1.692                      | 0.37 | 0.52275        | 1.680                      | 0.37       | 0.50607        |                        |
|           | Co1 - O2             | 1.899(2) | 1.692                      | 0.37 | 0.57151        | 1.680                      | 0.37       | 0.55328        |                        |
|           | Co1 -O2*             | 1.899(2) | 1.692                      | 0.37 | 0.57151        | 1.680                      | 0.37       | 0.55328        |                        |
|           | Co1 - N1*            | 1.896(3) | 1.692                      | 0.37 | 0.57617        | 1.680                      | 0.37       | 0.55778        |                        |
|           | Co1 - N1             | 1.896(3) | 1.692                      | 0.37 | 0.57617        | 1.680                      | 0.37       | 0.55778        |                        |
|           |                      |          | <b>Sum</b>                 |      | <b>3.34088</b> |                            | <b>Sum</b> | <b>3.23427</b> | <b>Co<sup>3+</sup></b> |
| <b>4</b>  | Co1 - O1*            | 1.936(3) | 1.692                      | 0.37 | 0.51713        | 1.680                      | 0.37       | 0.50062        |                        |
|           | Co1 - O1             | 1.936(3) | 1.692                      | 0.37 | 0.51713        | 1.680                      | 0.37       | 0.50062        |                        |
|           | Co1 - O2             | 1.899(3) | 1.692                      | 0.37 | 0.57151        | 1.680                      | 0.37       | 0.55328        |                        |
|           | Co1 -O2*             | 1.899(3) | 1.692                      | 0.37 | 0.57151        | 1.680                      | 0.37       | 0.55328        |                        |
|           | Co1 - N1*            | 1.904(4) | 1.692                      | 0.37 | 0.56384        | 1.680                      | 0.37       | 0.54585        |                        |
|           | Co1 - N1             | 1.904(4) | 1.692                      | 0.37 | 0.56384        | 1.680                      | 0.37       | 0.54585        |                        |
|           |                      |          | <b>Sum</b>                 |      | <b>3.30499</b> |                            | <b>Sum</b> | <b>3.19952</b> | <b>Co<sup>3+</sup></b> |

**Table S3.** Bond lengths (Å) found in 1-4.

| Compound 1 |          | Compound 2 |          | Compound 3 |          | Compound 4 |          |
|------------|----------|------------|----------|------------|----------|------------|----------|
| Dy1-O3     | 2.423(4) | Tb1- O1*   | 2.388(5) | Hol-O3     | 2.421(2) | Er1-O3     | 2.413(3) |
| Dy1-O3*    | 2.423(4) | Tb1- O1    | 2.388(5) | Hol-O3*    | 2.421(2) | Er1-O3*    | 2.413(3) |
| Dy1-O1     | 2.374(4) | Tb1- O3    | 2.439(5) | Hol-O1     | 2.365(2) | Er1-O1     | 2.355(3) |
| Dy1-O1*    | 2.374(4) | Tb1- O3*   | 2.439(5) | Hol-O1*    | 2.365(2) | Er1-O1*    | 2.355(3) |
| Dy1-O4*    | 2.297(4) | Tb1- O4    | 2.314(5) | Hol-O4*    | 2.294(2) | Er1-O4*    | 2.280(3) |
| Dy1-O4     | 2.297(4) | Tb1- O4*   | 2.314(5) | Hol-O4     | 2.294(2) | Er1-O4     | 2.280(3) |
| Dy1-O6     | 2.379(4) | Tb1- O6    | 2.397(5) | Hol-O6     | 2.367(2) | Er1-O6     | 2.358(3) |
| Dy1-O6*    | 2.379(4) | Tb1- O6*   | 2.397(5) | Hol-O6*    | 2.367(2) | Er1-O6*    | 2.358(3) |
| Co1-O1*    | 1.925(4) | Co1-O1*    | 1.935(5) | Co1-O1*    | 1.932(2) | Co1-O1*    | 1.936(3) |
| Co1-O1     | 1.925(4) | Co1-O1     | 1.935(5) | Co1-O1     | 1.932(2) | Co1-O1     | 1.936(3) |
| Co1-O3     | 1.899(3) | Co1-O2     | 1.906(5) | Co1-O2     | 1.899(2) | Co1-O2     | 1.899(3) |
| Co1-O3*    | 1.899(3) | Co1-O2*    | 1.906(5) | Co1-O2*    | 1.899(2) | Co1-O2*    | 1.899(3) |
| Co1-N1*    | 1.892(5) | Co1-N1*    | 1.902(6) | Co1-N1*    | 1.896(3) | Co1-N1*    | 1.904(4) |
| Co1-N1     | 1.892(5) | Co1-N1     | 1.902(6) | Co1-N1     | 1.896(3) | Co1-N1     | 1.904(4) |

**Table S4.** Bond angles (°) found in 1.

|                                     |             |                                     |             |
|-------------------------------------|-------------|-------------------------------------|-------------|
| O3 <sup>1</sup> Dy1 Co1             | 64.15 (9)   | N1 <sup>1</sup> Co1 O1 <sup>1</sup> | 91.46 (19)  |
| O3 Dy1 Co1                          | 64.15 (9)   | N1 <sup>1</sup> Co1 O1              | 175.2 (2)   |
| O3 <sup>1</sup> Dy1 O3              | 128.30 (19) | N1 Co1 O1                           | 91.46 (19)  |
| O1 <sup>1</sup> Dy1 Co1             | 36.03 (9)   | N1 Co1 O2                           | 88.30 (19)  |
| O1 Dy1 Co1                          | 36.03 (9)   | N1 <sup>1</sup> Co1 O2              | 89.25 (19)  |
| O1 <sup>1</sup> Dy1 O3              | 69.38 (13)  | N1 Co1 O2 <sup>1</sup>              | 89.25 (19)  |
| O1 Dy1 O3                           | 69.32 (13)  | N1 <sup>1</sup> Co1 O2 <sup>1</sup> | 88.30 (19)  |
| O1 Dy1 O3 <sup>1</sup>              | 69.38 (13)  | N1 <sup>1</sup> Co1 N1              | 84.1 (3)    |
| O1 <sup>1</sup> Dy1 O3 <sup>1</sup> | 69.32 (13)  | O6 <sup>1</sup> Dy1 Co1             | 113.54 (12) |
| O1 <sup>1</sup> Dy1 O1              | 72.06 (18)  | O6 <sup>1</sup> Dy1 O3 <sup>1</sup> | 77.17 (14)  |
| O1 Dy1 O6                           | 81.36 (16)  | O6 <sup>1</sup> Dy1 O3              | 124.77 (15) |
| O1 <sup>1</sup> Dy1 O6 <sup>1</sup> | 81.36 (16)  | O6 Dy1 O3                           | 77.17 (14)  |
| O1 Dy1 O6 <sup>1</sup>              | 142.77 (15) | O6 Dy1 O3 <sup>1</sup>              | 124.78 (15) |
| O1 <sup>1</sup> Dy1 O6              | 142.77 (14) | O6 <sup>1</sup> Dy1 O6              | 132.9 (2)   |
| O4 <sup>1</sup> Dy1 Co1             | 131.98 (10) | O1 Co1 Dy1                          | 46.49 (11)  |
| O4 Dy1 Co1                          | 131.98 (10) | O1 <sup>1</sup> Co1 Dy1             | 46.49 (11)  |
| O4 <sup>1</sup> Dy1 O3 <sup>1</sup> | 74.34 (14)  | O1 <sup>1</sup> Co1 O1              | 93.0 (2)    |
| O4 Dy1 O3                           | 74.34 (14)  | O2 Co1 Dy1                          | 91.65 (13)  |
| O4 <sup>1</sup> Dy1 O3              | 148.56 (14) | O2 <sup>1</sup> Co1 Dy1             | 91.65 (13)  |
| O4 Dy1 O3 <sup>1</sup>              | 148.56 (14) | O2 Co1 O1 <sup>1</sup>              | 89.84 (16)  |
| O4 <sup>1</sup> Dy1 O1              | 107.67 (14) | O2 <sup>1</sup> Co1 O1              | 89.84 (16)  |
| O4 Dy1 O1                           | 141.10 (13) | O2 <sup>1</sup> Co1 O1 <sup>1</sup> | 92.44 (17)  |
| O4 <sup>1</sup> Dy1 O1 <sup>1</sup> | 141.10 (14) | O2 Co1 O1                           | 92.44 (17)  |
| O4 Dy1 O1 <sup>1</sup>              | 107.68 (14) | O2 <sup>1</sup> Co1 O2              | 176.7 (3)   |
| O4 <sup>1</sup> Dy1 O4              | 96.0 (2)    | O4 <sup>1</sup> Dy1 O6 <sup>1</sup> | 77.47 (16)  |
| O4 Dy1 O6 <sup>1</sup>              | 71.50 (15)  | O4 <sup>1</sup> Dy1 O6              | 71.50 (15)  |
| O4 Dy1 O6                           | 77.46 (16)  | N1 Co1 O1 <sup>1</sup>              | 175.3 (2)   |

**Table S5.** Bond angles (°) found in **2**.

|                                     |            |                                     |            |
|-------------------------------------|------------|-------------------------------------|------------|
| O1 <sup>1</sup> Tb1 Co1             | 36.04(11)  | N1 Co1 O2 <sup>1</sup>              | 88.8(2)    |
| O1 Tb1 Co1                          | 36.04(11)  | N1 <sup>1</sup> Co1 O2 <sup>1</sup> | 88.1(2)    |
| O1 Tb1 O1 <sup>1</sup>              | 72.1(2)    | N1 Co1 O2                           | 88.1(2)    |
| O1 <sup>1</sup> Tb1 O3              | 69.02(16)  | N1 Co1 O1                           | 91.7(2)    |
| O1 <sup>1</sup> Tb1 O3 <sup>1</sup> | 69.32(16)  | N1 <sup>1</sup> Co1 O1 <sup>1</sup> | 91.7(2)    |
| O1 Tb1 O3                           | 69.32(16)  | N1 Co1 O1 <sup>1</sup>              | 174.8(2)   |
| O1 Tb1 O3 <sup>1</sup>              | 69.03(16)  | N1 <sup>1</sup> Co1 O1              | 174.8(2)   |
| O1 <sup>1</sup> Tb1 O6              | 81.47(17)  | N1 Co1 N1 <sup>1</sup>              | 83.5(4)    |
| O1 <sup>1</sup> Tb1 O6 <sup>1</sup> | 142.78(17) | C9 O2 Co1                           | 121.4(4)   |
| O1 Tb1 O6                           | 142.78(17) | Co1 O1 Tb1                          | 97.38(19)  |
| O1 Tb1 O6 <sup>1</sup>              | 81.47(17)  | O6 <sup>1</sup> Tb1 O3 <sup>1</sup> | 124.71(17) |
| O3 <sup>1</sup> Tb1 Co1             | 63.91(12)  | O6 Tb1 O3 <sup>1</sup>              | 77.46(17)  |
| O3 Tb1 Co1                          | 63.91(11)  | O6 <sup>1</sup> Tb1 O3              | 77.47(17)  |
| O3 <sup>1</sup> Tb1 O3              | 127.8(2)   | O6 Tb1 O6 <sup>1</sup>              | 132.8(3)   |
| O4 <sup>1</sup> Tb1 Co1             | 132.31(13) | O2 <sup>1</sup> Co1 Tb1             | 92.13(16)  |
| O4 Tb1 Co1                          | 132.30(13) | O6 <sup>1</sup> Tb1 O3 <sup>1</sup> | 124.71(17) |
| O4 Tb1 O1                           | 107.97(17) | O6 Tb1 O3 <sup>1</sup>              | 77.46(17)  |
| O4 <sup>1</sup> Tb1 O1              | 141.26(17) | O6 <sup>1</sup> Tb1 O3              | 77.47(17)  |
| O4 Tb1 O1 <sup>1</sup>              | 141.26(17) | O2 Co1 Tb1                          | 92.13(16)  |
| O4 <sup>1</sup> Tb1 O1 <sup>1</sup> | 107.96(17) | O2 <sup>1</sup> Co1 O2              | 175.7(3)   |
| O4 <sup>1</sup> Tb1 O3              | 74.70(17)  | O2 <sup>1</sup> Co1 O1              | 90.0(2)    |
| O4 Tb1 O3 <sup>1</sup>              | 74.70(17)  | O2 Co1 O1                           | 92.9(2)    |
| O4 <sup>1</sup> Tb1 O3 <sup>1</sup> | 148.85(17) | O2 Co1 Tb1                          | 92.13(16)  |
| O4 Tb1 O3                           | 148.86(17) | O2 <sup>1</sup> Co1 O2              | 175.7(3)   |
| O4 <sup>1</sup> Tb1 O4              | 95.4(3)    | O2 <sup>1</sup> Co1 O1              | 90.0(2)    |
| O4 Tb1 O6 <sup>1</sup>              | 71.52(17)  | O2 Co1 O1 <sup>1</sup>              | 90.0(2)    |
| O4 Tb1 O6                           | 77.15(18)  | O2 <sup>1</sup> Co1 O1 <sup>1</sup> | 92.9(2)    |
| O4 <sup>1</sup> Tb1 O6              | 71.52(17)  | O1 <sup>1</sup> Co1 Tb1             | 46.58(14)  |
| O4 <sup>1</sup> Tb1 O6 <sup>1</sup> | 77.15(18)  | O1 Co1 Tb1                          | 46.57(14)  |
| O6 Tb1 Co1                          | 113.62(13) | O1 Co1 O1 <sup>1</sup>              | 93.2(3)    |
| O6 <sup>1</sup> Tb1 Co1             | 113.62(13) | N1 <sup>1</sup> Co1 Tb1             | 138.3(2)   |
| O6 Tb1 O3                           | 124.71(17) | N1 Co1 Tb1                          | 138.3(2)   |
| O2 Co1 O1 <sup>1</sup>              | 90.0(2)    | N1 <sup>1</sup> Co1 O2              | 88.8(2)    |

**Table S6.** Bond angles (°) found in **3**.

|                                     |            |                                     |            |
|-------------------------------------|------------|-------------------------------------|------------|
| O1 <sup>1</sup> Ho1 Co1             | 36.26(5)   | N1 <sup>1</sup> Co1 O2              | 89.30(10)  |
| O1 Ho1 Co1                          | 36.26(5)   | N1 Co1 O2                           | 88.34(10)  |
| O1 Ho1 O1 <sup>1</sup>              | 72.51(10)  | N1 Co1 O2 <sup>1</sup>              | 89.30(10)  |
| O1 <sup>1</sup> Ho1 O3 <sup>1</sup> | 69.69(7)   | N1 <sup>1</sup> Co1 O1              | 175.31(10) |
| O1 Ho1 O3                           | 69.69(7)   | N1 Co1 O1                           | 91.59(10)  |
| O1 Ho1 O3 <sup>1</sup>              | 69.46(7)   | N1 Co1 O1 <sup>1</sup>              | 175.31(10) |
| O1 <sup>1</sup> Ho1 O3              | 69.46(7)   | N1 <sup>1</sup> Co1 O1 <sup>1</sup> | 91.59(10)  |
| O1 <sup>1</sup> Ho1 O6              | 80.92(8)   | N1 Co1 N1 <sup>1</sup>              | 84.11(16)  |
| O1 <sup>1</sup> Ho1 O6 <sup>1</sup> | 142.73(7)  | C9 O2 Co1                           | 122.0(2)   |
| O1 Ho1 O6                           | 142.73(7)  | Co1 O1 Ho1                          | 97.36(8)   |
| O1 Ho1 O6 <sup>1</sup>              | 80.92(8)   | O6 <sup>1</sup> Ho1 O3 <sup>1</sup> | 124.42(7)  |
| O3 Ho1 Co1                          | 64.35(5)   | O6 <sup>1</sup> Ho1 O3              | 77.13(7)   |
| O3 <sup>1</sup> Ho1 Co1             | 64.35(5)   | O6 Ho1 O6 <sup>1</sup>              | 133.39(11) |
| O3 Ho1 O3 <sup>1</sup>              | 128.70(10) | O2 Co1 Ho1                          | 91.59(7)   |
| O4 <sup>1</sup> Ho1 Co1             | 132.26(6)  | O2 <sup>1</sup> Co1 Ho1             | 91.58(7)   |
| O4 Ho1 Co1                          | 132.26(6)  | O2 Co1 O2 <sup>1</sup>              | 176.83(13) |
| O4 <sup>1</sup> Ho1 O1              | 141.12(7)  | O2 Co1 O1 <sup>1</sup>              | 89.73(9)   |
| O4 Ho1 O1                           | 107.82(7)  | O2 Co1 O1                           | 92.45(9)   |
| O4 <sup>1</sup> Ho1 O1 <sup>1</sup> | 107.82(7)  | O2 <sup>1</sup> Co1 O1 <sup>1</sup> | 92.45(9)   |
| O4 Ho1 O1 <sup>1</sup>              | 141.12(7)  | O6 Ho1 Co1                          | 113.30(6)  |
| O4 <sup>1</sup> Ho1 O3 <sup>1</sup> | 148.65(7)  | O6 Ho1 O3                           | 124.41(7)  |
| O4 Ho1 O3 <sup>1</sup>              | 74.22(7)   | O6 Ho1 O3 <sup>1</sup>              | 77.13(7)   |
| O4 Ho1 O3                           | 148.65(7)  | O2 <sup>1</sup> Co1 O1              | 89.73(9)   |
| O4 <sup>1</sup> Ho1 O3              | 74.22(7)   | O1 Co1 Ho1                          | 46.39(6)   |
| O4 <sup>1</sup> Ho1 O4              | 95.49(11)  | O1 <sup>1</sup> Co1 Ho1             | 46.39(6)   |
| O4 Ho1 O6                           | 77.40(8)   | O1 Co1 O1 <sup>1</sup>              | 92.77(12)  |
| O4 <sup>1</sup> Ho1 O6              | 71.70(8)   | N1 <sup>1</sup> Co1 Ho1             | 137.94(8)  |
| O4 Ho1 O6 <sup>1</sup>              | 71.70(8)   | N1 Co1 Ho1                          | 137.95(8)  |
| O4 <sup>1</sup> Ho1 O6 <sup>1</sup> | 77.40(8)   | N1 <sup>1</sup> Co1 O2 <sup>1</sup> | 88.34(10)  |
| O6 <sup>1</sup> Ho1 Co1             | 113.31(6)  |                                     |            |

**Table S7.** Bond angles (°) found in **4**.

|                                     |            |                                     |            |
|-------------------------------------|------------|-------------------------------------|------------|
| O1 <sup>1</sup> Er1 Co1             | 36.46(7)   | O1 <sup>1</sup> Co1 O1              | 92.63(17)  |
| O1 Er1 Co1                          | 36.46(7)   | N1 Co1 Er1                          | 137.91(12) |
| O1 <sup>1</sup> Er1 O1              | 72.92(14)  | N1 <sup>1</sup> Co1 Er1             | 137.91(12) |
| O1 <sup>1</sup> Er1 O3 <sup>1</sup> | 69.65(10)  | N1 Co1 O1                           | 91.62(14)  |
| O1 Er1 O3 <sup>1</sup>              | 70.05(10)  | N1 <sup>1</sup> Co1 O1              | 175.35(15) |
| O1 <sup>1</sup> Er1 O3              | 70.05(10)  | N1 <sup>1</sup> Co1 O1 <sup>1</sup> | 91.62(14)  |
| O1 Er1 O3                           | 69.65(10)  | N1 Co1 O1 <sup>1</sup>              | 175.36(15) |
| O1 Er1 O6                           | 80.67(11)  | N1 <sup>1</sup> Co1 N1              | 84.2(2)    |
| O1 <sup>1</sup> Er1 O6 <sup>1</sup> | 80.67(11)  | Co1 O1 Er1                          | 97.22(12)  |
| O1 <sup>1</sup> Er1 O6              | 142.63(10) | O3 <sup>1</sup> Er1 O3              | 129.28(14) |
| O1 Er1 O6 <sup>1</sup>              | 142.63(10) | O6 <sup>1</sup> Er1 Co1             | 113.16(8)  |
| O4 Er1 Co1                          | 132.44(8)  | O6 Er1 Co1                          | 113.16(8)  |
| O4 <sup>1</sup> Er1 Co1             | 132.44(8)  | O6 <sup>1</sup> Er1 O3 <sup>1</sup> | 124.43(10) |
| O4 Er1 O1                           | 141.26(10) | O6 <sup>1</sup> Er1 O3              | 76.79(10)  |
| O4 <sup>1</sup> Er1 O1              | 107.78(10) | O6 Er1 O3 <sup>1</sup>              | 76.79(10)  |
| O4 Er1 O1 <sup>1</sup>              | 107.78(10) | O6 Er1 O3                           | 124.43(10) |
| O4 <sup>1</sup> Er1 O1 <sup>1</sup> | 141.26(10) | O6 Er1 O6 <sup>1</sup>              | 133.68(16) |
| O4 Er1 O4 <sup>1</sup>              | 95.13(15)  | O2 <sup>1</sup> Co1 Er1             | 91.75(9)   |
| O4 Er1 O3 <sup>1</sup>              | 74.09(10)  | O2 Co1 Er1                          | 91.75(9)   |
| O4 <sup>1</sup> Er1 O3              | 74.09(10)  | O2 <sup>1</sup> Co1 O2              | 176.51(19) |
| O4 <sup>1</sup> Er1 O3 <sup>1</sup> | 148.44(11) | O2 Co1 O1 <sup>1</sup>              | 92.61(12)  |
| O4 Er1 O3                           | 148.43(11) | O2 <sup>1</sup> Co1 O1              | 92.61(12)  |
| O4 Er1 O6 <sup>1</sup>              | 71.88(11)  | O2 <sup>1</sup> Co1 O1 <sup>1</sup> | 89.80(12)  |
| O4 <sup>1</sup> Er1 O6 <sup>1</sup> | 77.31(11)  | O2 Co1 O1                           | 89.80(12)  |
| O4 <sup>1</sup> Er1 O6              | 71.88(11)  | O2 Co1 N1                           | 89.26(14)  |
| O4 Er1 O6                           | 77.31(11)  | O2 Co1 N1 <sup>1</sup>              | 88.14(14)  |
| O3 <sup>1</sup> Er1 Co1             | 64.64(7)   | O2 <sup>1</sup> Co1 N1              | 88.14(14)  |
| O3 Er1 Co1                          | 64.64(7)   | O2 <sup>1</sup> Co1 N1 <sup>1</sup> | 89.26(14)  |
| O1 Co1 Er1                          | 46.32(8)   | O1 <sup>1</sup> Co1 Er1             | 46.32(9)   |

## Shape analysis

|          |        |                                            |
|----------|--------|--------------------------------------------|
| OP-8     | 1 D8h  | Octagon                                    |
| HPY-8    | 2 C7v  | Heptagonal pyramid                         |
| HBPY-8   | 3 D6h  | Hexagonal bipyramid                        |
| CU-8     | 4 Oh   | Cube                                       |
| SAPR-8   | 5 D4d  | Square antiprism                           |
| TDD-8    | 6 D2d  | Triangular dodecahedron                    |
| JGBF-8   | 7 D2d  | Johnson gyrobifastigium J26                |
| JETBPY-8 | 8 D3h  | Johnson elongated triangular bipyramid J14 |
| JBTPR-8  | 9 C2v  | Biaugmented trigonal prism J50             |
| BTPR-8   | 10 C2v | Biaugmented trigonal prism                 |
| JSD-8    | 11 D2d | Snub diphenooid J84                        |
| TT-8     | 12 Td  | Triakis tetrahedron                        |
| ETBPY-8  | 13 D3h | Elongated trigonal bipyramid               |

**Table S8.** Shape analysis for complexes **1-4**

| Structure [ML9] | Co <sup>III</sup> -Dy | Co <sup>III</sup> -Tb | Co <sup>III</sup> -Ho | Co <sup>III</sup> -Er |
|-----------------|-----------------------|-----------------------|-----------------------|-----------------------|
| <b>OP-8</b>     | 28.653                | 28.559                | 28.680                | 28.640                |
| <b>HPY-8</b>    | 22.493                | 22.449                | 22.510                | 22.567                |
| <b>HBPY-8</b>   | 15.361                | 15.350                | 15.371                | 15.465                |
| <b>CU-8</b>     | 8.911                 | 8.837                 | 8.858                 | 8.944                 |
| <b>SAPR-8</b>   | 1.314                 | 1.292                 | 1.229                 | 1.182                 |
| <b>TDD-8</b>    | <b>1.127</b>          | <b>1.136</b>          | <b>1.110</b>          | <b>1.086</b>          |
| <b>JGBF-8</b>   | 15.324                | 15.350                | 15.384                | 15.436                |
| <b>JETBPY-8</b> | 27.333                | 27.554                | 27.344                | 27.312                |
| <b>JBTPR-8</b>  | 2.771                 | 2.775                 | 2.720                 | 2.653                 |
| <b>BTPR-8</b>   | 2.337                 | 2.342                 | 2.289                 | 2.234                 |
| <b>JSD-8</b>    | 3.488                 | 3.513                 | 3.482                 | 3.409                 |
| <b>TT-8</b>     | 9.426                 | 9.340                 | 9.381                 | 9.461                 |
| <b>ETBPY-8</b>  | 22.356                | 22.566                | 22.456                | 22.515                |

Structure [ML8] OP-8 HPY-8 HBPY-8 CU-8 SAPR-8 TDD-8 JGBF-8 JETBPY-8 JBTPR-8 BTPR-8 JSD-8 TT-8 ETBPY-8  
 Co\_Dy , 28.653, 22.493, 15.361, 8.911, 1.314, 1.127, 15.324, 27.333, 2.771, 2.337, 3.488, 9.426, 22.356

Structure [ML8] OP-8 HPY-8 HBPY-8 CU-8 SAPR-8 TDD-8 JGBF-8 JETBPY-8 JBTPR-8 BTPR-8 JSD-8 TT-8 ETBPY-8  
 Co\_Tb , 28.559, 22.449, 15.350, 8.837, 1.292, 1.136, 15.350, 27.554, 2.775, 2.342, 3.513, 9.340, 22.566

Structure [ML8] OP-8 HPY-8 HBPY-8 CU-8 SAPR-8 TDD-8 JGBF-8 JETBPY-8 JBTPR-8 BTPR-8 JSD-8 TT-8 ETBPY-8  
 Co\_Ho , 28.680, 22.510, 15.371, 8.858, 1.229, 1.110, 15.384, 27.344, 2.720, 2.289, 3.482, 9.381, 22.456

Structure [ML8] OP-8 HPY-8 HBPY-8 CU-8 SAPR-8 TDD-8 JGBF-8 JETBPY-8 JBTPR-8 BTPR-8 JSD-8 TT-8 ETBPY-8  
 Co\_Er , 28.640, 22.567, 15.465, 8.944, 1.182, 1.086, 15.436, 27.312, 2.653, 2.234, 3.409, 9.461, 22.515

**Table S9.** List of Co<sup>III</sup>-Ln<sup>III</sup> complexes display Single-Ion Magnetic behaviour reported in literature.<sup>1-5</sup>

| Molecular formula and ligands                                                                                                                                                                                                                                                                                                                                                                     | SMMs | Energy barrier ( $U_{\text{eff}}$ ) and relaxation time                                                                                             | Ref.      |
|---------------------------------------------------------------------------------------------------------------------------------------------------------------------------------------------------------------------------------------------------------------------------------------------------------------------------------------------------------------------------------------------------|------|-----------------------------------------------------------------------------------------------------------------------------------------------------|-----------|
| [Co <sup>II</sup> <sub>2</sub> ( $\mu$ -OH <sub>2</sub> )(O <sub>2</sub> CCMe <sub>3</sub> ) <sub>4</sub> (HO <sub>2</sub> CCMe <sub>3</sub> ) <sub>4</sub> ]<br>[where Ln = Dy, for 1; Tb, for 2; Ho, for 3; and Er, for 4]<br><i>N,N'</i> -Bis(salicylidene)ethylenediamine (H <sub>2</sub> L)                                                                                                  | Y    | 3.9 K, $1.22 \times 10^{-6}$ s (for <b>1</b> )                                                                                                      | this work |
| K[Dy{Co(nta)(m-ox)} <sub>2</sub> (H <sub>2</sub> O) <sub>5</sub> ] ( <b>2</b> )<br>H <sub>3</sub> nta = nitrilotriacetic acid                                                                                                                                                                                                                                                                     | No   | No                                                                                                                                                  | 1         |
| [L <sup>I</sup> Co(III)Br <sub>2</sub> Dy(III)(acac) <sub>2</sub> ]-CH <sub>2</sub> Cl <sub>2</sub> ( <b>5</b> ),<br>[L <sup>2</sup> Co(III)Cl <sub>2</sub> Dy(III)(acac)Cl(MeOH)] ( <b>6</b> ),<br>[L <sup>2</sup> Co(III)Cl <sub>2</sub> Dy(III)(acac)Cl(H <sub>2</sub> O)] ( <b>7</b> ),<br>[L <sup>2</sup> Co(III)Cl <sub>2</sub> Dy(III)(NO <sub>3</sub> ) <sub>2</sub> (MeOH)] ( <b>8</b> ) | Y    | 167 K, $2.07 \times 10^{-7}$ s (for <b>5</b> ),<br>118 K, $2.90 \times 10^{-7}$ s (for <b>6</b> ),<br>75 K, $3.20 \times 10^{-7}$ s (for <b>7</b> ) | 2         |
| [Co <sup>III</sup> Dy <sup>III</sup> L <sup>I</sup> ( $\mu$ -OAc) <sub>2</sub> ](NO <sub>3</sub> ) <sub>2</sub><br>[N,N-ethylenebis(3-ethoxysalicylaldimine) = H <sub>2</sub> L <sup>I</sup> ]<br>[Co <sup>III</sup> Dy <sup>III</sup> L <sup>2</sup> ( $\mu$ -OAc) <sub>2</sub> ](NO <sub>3</sub> ) <sub>2</sub> [N,N-ethylenebis(3-methoxysalicylaldimine) = H <sub>2</sub> L <sup>2</sup> ]    |      | 18 K, $2.5 \times 10^{-6}$ s                                                                                                                        | 3         |
| [Co(H <sub>0.5</sub> L)Dy(DBM) <sub>2</sub> H <sub>2</sub> O](ClO <sub>4</sub> ) <sub>0.5</sub> (H <sub>2</sub> O) <sub>3</sub><br>H <sub>4</sub> L (2,2-[1,2-ethanediylbis[(hydroxyethylimino)methylene]]bis[6-methoxy-4-methyl-phenol]), dibenzoylmethane (HDBM)                                                                                                                                | Y    | 88.9 K, $1.34 \times 10^{-10}$ s                                                                                                                    | 4         |
| [Co <sup>III</sup> Dy <sup>III</sup> (HL)(AcO) <sub>3</sub> (H <sub>2</sub> O) <sub>3</sub> ](AcO)(H <sub>2</sub> O)                                                                                                                                                                                                                                                                              | Y    | 113 K, $7.0 \times 10^{-9}$ s                                                                                                                       | 5         |

### Computational details:

Ab Initio Calculations. Using MOLCAS 8.2,<sup>6</sup> ab initio calculations were performed on the trivalent lanthanide ions Dy, Tb, Ho, and Er using the single-crystal structural data. Relativistic effects are taken into account on the basis of the Douglas–Kroll.<sup>7</sup> The complete active space self-consistent field (CASSCF) method achieved the spin-free eigenstates.<sup>8</sup> We have employed the [ANO-RCC...8s7p5d3f2g1h] basis set<sup>9</sup> for Dy, Tb, Ho, and Er atoms, the [ANO-RCC...3s2p] basis set for C atoms, the [ANO-RCC...2s] basis set for H atoms, the [ANO-RCC...3s2p1d] basis set for N atoms, and the [ANO-RCC...3s2p1d] basis set for O atoms. The CASSCF calculations that were performed included 9 electrons across 7 4f orbitals of the Dy<sup>3+</sup> ion, 8 electrons across 7 4f orbitals of the Tb<sup>3+</sup> ion, 10 electrons across 7 4f orbitals of the Ho<sup>3+</sup> ion, and 11 electrons across 7 4f orbitals of the Er<sup>3+</sup> in **1–4**, respectively. With this active space, 21 roots in the



configuration interaction (CI) procedure were computed for complex **1**. We also considered 7 septet excited states, 140 quintet excited states, and 195 triplet excited states for complex **2** and 35 quintet excited states, 210 triplet excited states, 195 singlet excited states for complex **3**, and 35 quartet excited states, 212 doublets states for complex **4** in the calculations to compute the anisotropy.

After computing these excited states, we mixed all roots using RASSI-SO;<sup>10</sup> spin-orbit coupling is considered within the space of the calculated spin-free eigenstates for 2, 3, and 4. Moreover, these computed SO states have been considered in the SINGLE\_ANISO<sup>11</sup> program to compute the g tensors. Cholesky decomposition for 2-electron integrals has been employed throughout our calculations. Crystal-field parameters have been extracted using the SINGLE\_ANISO code, as implemented in MOLCAS 8.2.

## References

1. Y. Yamada, M. Tanabe, Y. Miyashita, K.-I. Okamoto, Oxalato-bridged di- and trinuclear Co(III)/Dy(III) complexes derived from mononuclear Co(III) complex with nitrilotriacetate. *Polyhedron* 2003, **22**, 1455-1459. DOI: 10.1016/S0277-5387(03)00122-0.
2. J.-W. Yang, Y.-M. Tian, J. Tao, P. Chen, H.-F. Li, Y.-Q. Zhang, P.-F. Yan, W.-B. Sun, Modulation of the Coordination Environment around the Magnetic Easy Axis Leads to Significant Magnetic Relaxations in a Series of 3d-4f Schiff Complexes, *Inorg. Chem.*, 2018, **57**, 8065–8077. DOI: 10.1021/acs.inorgchem.8b00056.
3. S. Hazra, J. Titiš, D. Valigura, R. Boča, S. Mohanta, Bis-phenoxido and bis-acetato bridged heteronuclear {Co<sup>III</sup>Dy<sup>III</sup>} single molecule magnets with two slow relaxation branches, *Dalton Trans.*, 2016, **45**, 7510–7520. DOI: 10.1039/C6DT00848H.

4. M.-J. Liu, J. Yuan, B.-L. Wang, S.-T. Wu, Y.-Q. Zhang, C.-M. Liu, H.-Z. Kou, Spontaneous Resolution of Chiral Co(III)Dy(III) Single-Molecule Magnet Based on an Achiral Flexible Ligand. *Cryst. Growth&Des.* 2018, **18**, 7611–7617. DOI: 10.1021/acs.cgd.8b01410.
5. M. Dolai, M. Ali, J. Titiš, R. Boča, Cu(II)–Dy(III) and Co(III)–Dy(III) based single molecule magnets with multiple slow magnetic relaxation processes in the Cu(II)–Dy(III) complex. *Dalton Trans.*, 2015,**44**, 13242–13249. DOI: 10.1039/c5dt00960j.
6. F. Aquilante, T. B. Pedersen, V. Veryazov, R. Lindh, MOLCAS a software for multiconfigurational quantum chemistry calculations, *WIREs Comput. Mol. Sci.*, 2013, **3**, 143-149. DOI: 10.1002/wcms.1117.
7. B. A. Hess, C. M. Marian, U. Wahlgren, O. Gropen, A mean field spin-orbit method applicable to correlated wavefunctions, *Chem. Phys. Lett.*, 1996, **251**, 365-371. DOI: 10.1016/0009-2614(96)00119-4.
8. B. O. Roos, P.-A. Malmqvist, Relativistic quantum chemistry: the multiconfigurational approach, *Phys. Chem. Chem. Phys.*, 2004, **6**, 2919-2927. DOI: 10.1039/B401472N.
9. B. O. Roos, R. Lindh, P.-A. Malmqvist, V. Veryazov, P.-O. Widmark, A. C. Borin, New Relativistic Atomic Natural Orbital Basis Sets for Lanthanide Atoms with Applications to the Ce Diatom and LuF<sub>3</sub>, *J. Phys. Chem. A*, 2008, **112**, 11431-11435. DOI: 10.1021/jp803213j.
10. P. A. Malmqvist, B. O. Roos, B. Schimmelpfennig, The restricted active space (RAS) state interaction approach with spin-orbit coupling, *Chem. Phys. Lett.*, 2002, **357**, 230-240. DOI: 10.1016/S0009-2614(02)00498-0.

11. L. F. Chibotaru, L. Ungur, Ab initio calculation of anisotropic magnetic properties of complexes. I. Unique definition of pseudospin Hamiltonians and their derivation, *J. Chem. Phys.*, 2012, **137**, 064112-22. DOI: 10.1063/1.4739763.
